# Supplementary material for: Combining Ability Analysis of Yield-Related Traits of Two Elite Rice Restorer Lines in Chinese Hybrid Rice
Source: MDPI journal article supplement (doi:10.3390/ijms241512395), 2023-08-03
Supplement: s1 [file s1]

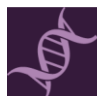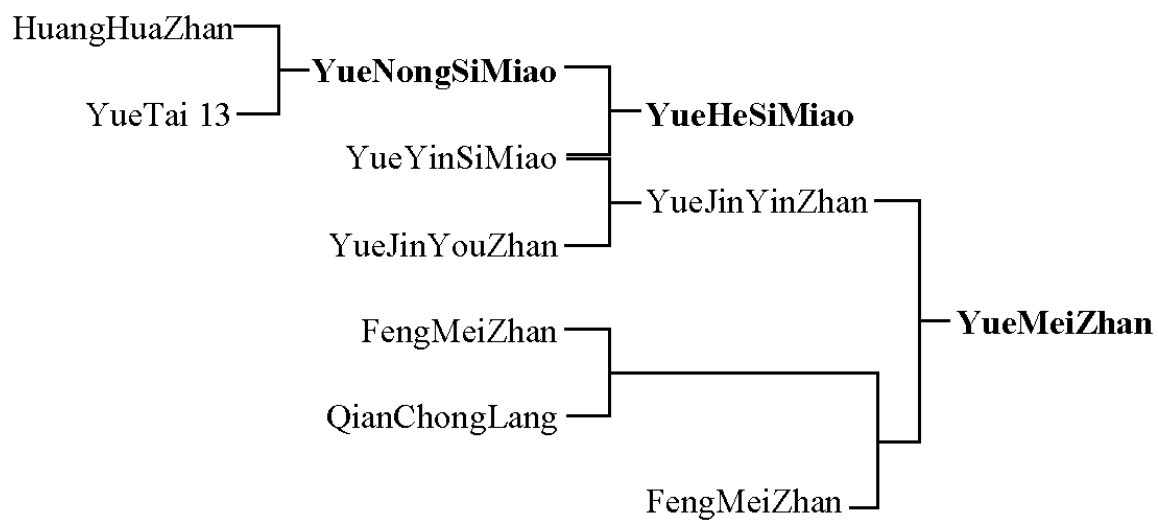

**Figure S1.** The pedigree details of the parental lines Yuenongsimiao, Yuehesimiao, and Yue-meizhan.
